# Supplementary material
Source: PubMed Central journal article supplement (PMC7658923)
Supplement: ao0c04174_si_001.pdf [file ao0c04174_si_001.pdf]

# Supporting Information

## Recent Progress and Challenges in $A_3Sb_2X_9$ Based Perovskite Solar Cells

Khursheed Ahmad<sup>†</sup> and Shaikh M Mobin<sup>†,‡,§\*</sup>

<sup>†</sup>Discipline of Chemistry, <sup>‡</sup>Discipline of Biosciences and Biomedical Engineering (BSBE) and

<sup>§</sup>Discipline of Metallurgy Engineering and Material Science (MEMS), Indian Institute of Technology Indore, Simrol, Khandwa Road, Indore, 453552, M.P. India

\*Email: [xray@iiti.ac.in](mailto:xray@iiti.ac.in)

Tel: +91-7312438752

## **Construction of PSCs**

Different device architectures of PSCs have been reported so far which also plays crucial role in controlling the performance of the PSCs.<sup>S1</sup> In general, PSCs consists of five different components which are: (i) conductive transparent glass substrate, (ii) electron transport layer, (iii) light absorber, (iv) hole transport layer and (v) metal contact. The fabrication of some PSCs device architectures associated with Sb are discussed in this section.

### **Planar architecture**

In 2016, Hebig *et al.*<sup>S2</sup> proposed MA<sub>3</sub>Sb<sub>2</sub>I<sub>9</sub> as energy material and developed the planar hetero-junction solar cell device. Here, the authors have used solvent engineering approach to prepare the MA<sub>3</sub>Sb<sub>2</sub>I<sub>9</sub> energy material. The surface of the Indium doped tin oxide (ITO) glass substrate was modified with PEDOT:PSS followed by the deposition of MA<sub>3</sub>Sb<sub>2</sub>I<sub>9</sub>. Further PC<sub>61</sub>BM layer was prepared on the MA<sub>3</sub>Sb<sub>2</sub>I<sub>9</sub> followed by the deposition of ZnO as interlayer. Finally, aluminium (Al) contact was also deposited using evaporation approach.

### **Mesoscopic architecture**

For mesoscopic PSCs, Fluorine-doped Tin Oxide (FTO) glass substrate (transparent conductive electrode substrate) to be cleaned and patterned with the help of HCl and zinc powder. Further compact and electron transport layers of transition metal oxides to be deposited using spin coat method. Energy materials such as MA<sub>3</sub>Sb<sub>2</sub>I<sub>9</sub> also deposited on the electron transport layer followed by the deposition of hole transport material and metal contact. Ahmad *et al.*<sup>S3</sup> developed the PSCs with mesoscopic architecture using TiO<sub>2</sub> as electron transport layer.

### **Inverted planar architecture**

In typical, PEDOT:PSS was spin coated on to the ITO glass substrate and annealed at 160 °C for 15 min. Further light absorber thin films was grown on the PEDOT:PSS/ITO glass substrate. The

electron transport layer was deposited on to the above prepared electrode. The device stack was completed by the deposition of silver using thermal evaporation approach.

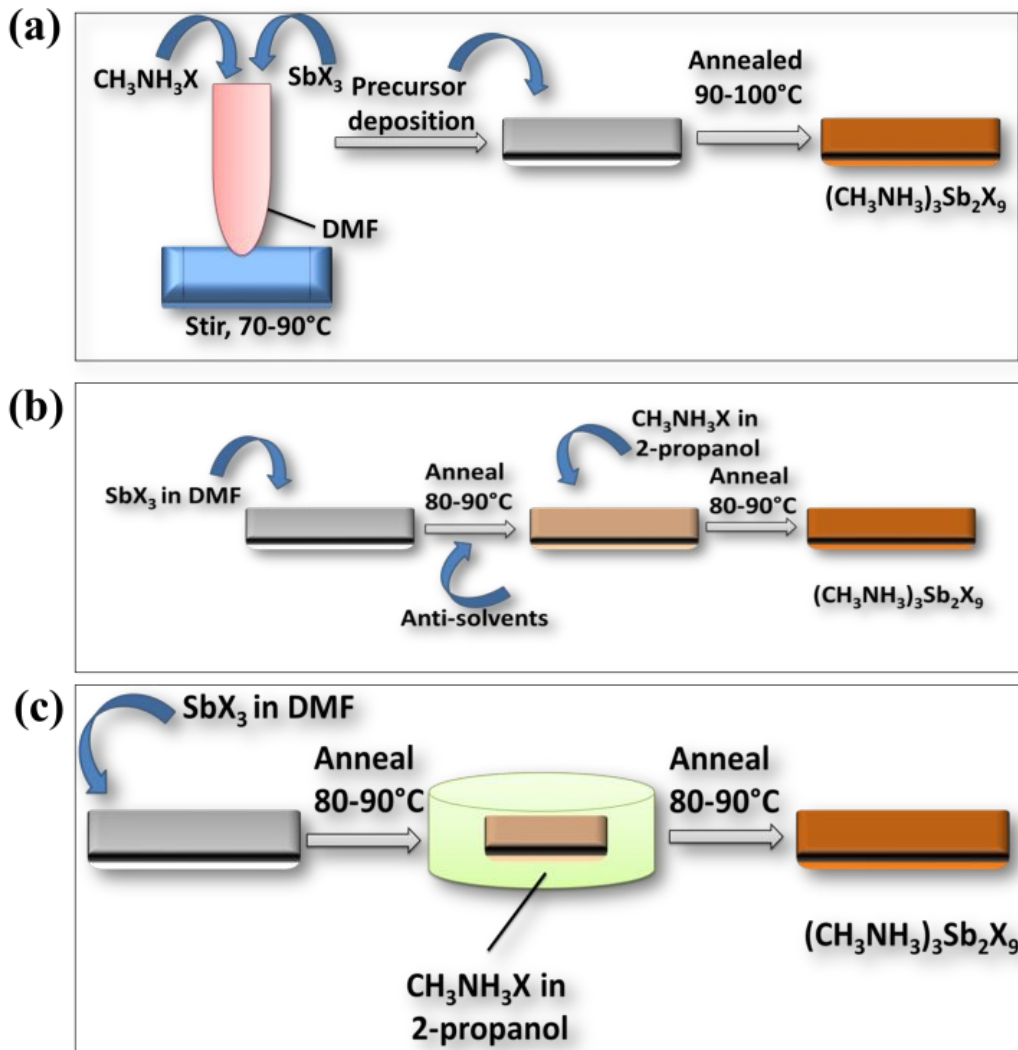

**Scheme S1.** Schematic illustration of the various synthesis approaches for the construction of perovskite films for PSCs (a)  $(\text{CH}_3\text{NH}_3)_3\text{Sb}_2\text{X}_9$  perovskite by one-step, (b) two-step and (c) sequential deposition method.

## References

- (S1) Ahmad, K.; Mobin, S.M. Graphene Oxide based Planar Heterojunction Perovskite Solar Cell under Ambient Condition. *New J. Chem.* **2017**, *41*, 14253-14258.
- (S2) Hebig, J.C.; Kühn, I.; Flohre, J.; Kirchartz, T. Optoelectronic Properties of  $(\text{CH}_3\text{NH}_3)_3\text{Sb}_2\text{I}_9$  Thin Films for Photovoltaic Applications. *ACS Energy Lett.* **2016**, *1*, 309-314.
- (S3) Ahmad, K.; Kumar, P.; Mobin, S.M. A Two-Step Modified Sequential Deposition Method-based Pb-Free  $(\text{CH}_3\text{NH}_3)_3\text{Sb}_2\text{I}_9$  Perovskite with Improved Open Circuit Voltage and Performance. *ChemElectroChem* **2020**, *7*, 946-950.
- (S4) Adonin, S.A.; Frolova, L.A.; Sokolov, M.N.; Shilov, G.V.; Korchagin et al. Antimony (V) Complex Halides: Lead-Free Perovskite-Like Materials for Hybrid Solar Cells. *Adv. Energy Mater.* **2017**, *8*, 1701140.
